# Supplementary material for: Adapting single-walled carbon nanotube-based thin-film transistors to flexible substrates with electrolyte-gated configurations using a versatile tri-layer polymer dielectric
Source: Royal Society of Chemistry journal article supplement (doi:10.1039/d4na01007h), 2024-12-23
Supplement: d4na01007h1.pdf [file d4na01007h1.pdf]

# Adapting Single-Walled Carbon Nanotube-Based Thin-Film Transistors to Flexible Substrates with Electrolyte-Gated Configurations Using a Versatile Tri-Layer Polymer Dielectric

*May Ourabi<sup>1</sup>, Roslyn S. Massey<sup>2</sup>, Ravi Prakash<sup>2,\*</sup> and Benoît H. Lessard<sup>1,3,\*</sup>*

1: Department of Chemical and Biological Engineering, University of Ottawa, 161 Louis Pasteur, Ottawa, ON, Canada

2: Department of Electronics Engineering, Carleton University, 1125 Colonel By Drive, Ottawa, Ontario K1S5B6, Canada

3: School of Electrical Engineering and Computer Science, University of Ottawa, 800 King Edward Ave., Ottawa, ON, Canada

\*corresponding authors: [benoit.lessard@uottawa.ca](mailto:benoit.lessard@uottawa.ca) (B.H.L) and [raviprakash@cunet.carleton.ca](mailto:raviprakash@cunet.carleton.ca) (R.P.)

*Supplementary Information*

Table S1. Comparison of water contact angle ( $^{\circ}$ ) before and after treatment with octyltrichlorosilane (OTS)

|        | Before OTS treatment   | After OTS treatment    |
|--------|------------------------|------------------------|
| Kapton | $73.1 \pm 1.6^{\circ}$ | $98.5 \pm 1.5^{\circ}$ |

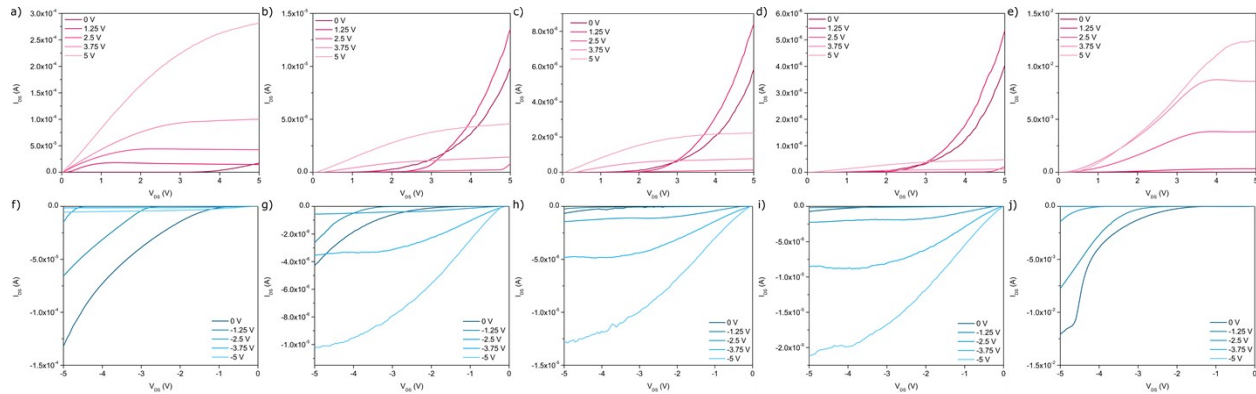

Figure S1. *n*- (red) and *p*-type (blue) output characteristics of a tri-layer polymer dielectric TFT fabricated on Kapton® after (a, f) 0 days, (b, g) 3 days, (c, h) 5 days, and (d, i) 7 days exposure to ambient air. (e) *n*- and (j) *p*-type output characteristics of a tri-layer polymer dielectric TFT fabricated on quartz after 7 days exposure to ambient air.

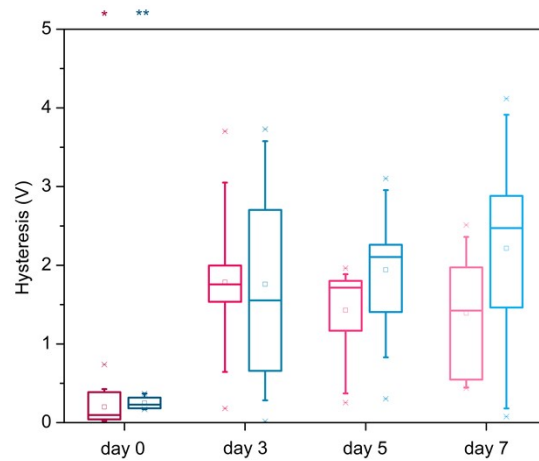

Figure S2. Hysteresis obtained from *n*- and *p*-type testing over 7 days in ambient air.

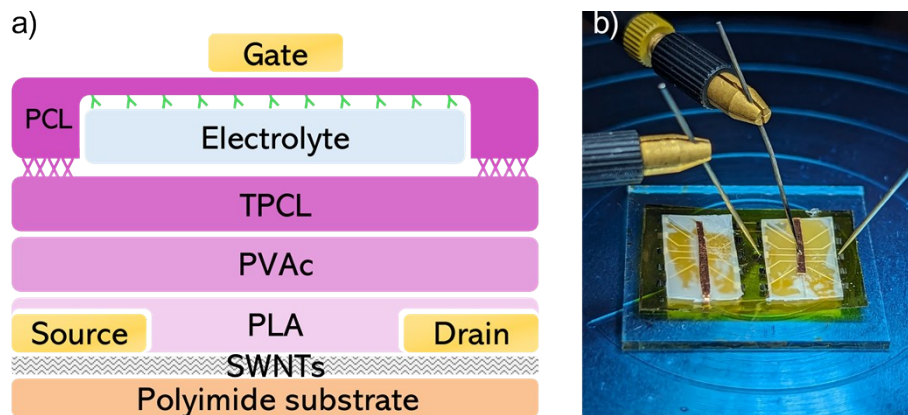

Figure S3. a) Schematic and b) photograph of the PCL-microchannel EG-SWNT-FET device architecture.

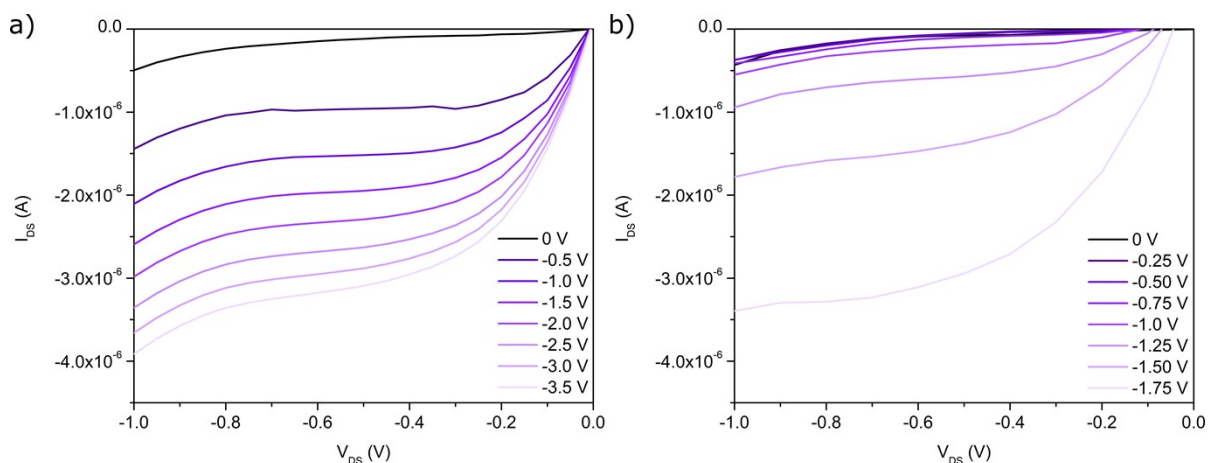

Figure S4. PCL-microchannel EG-SWNT-FET output characteristics using a) DI water and b) IX TAE buffer as the electrolyte.

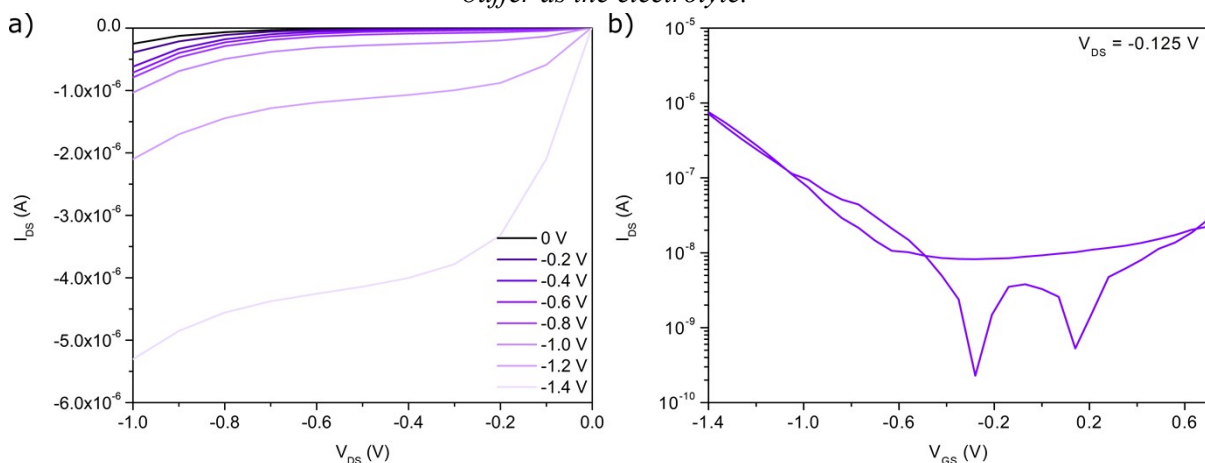

Figure S5. Non-a-synuclein specific PMMA-microchannel EG-SWNT-FET a) output and b) transfer characteristics using DI water as the electrolyte.

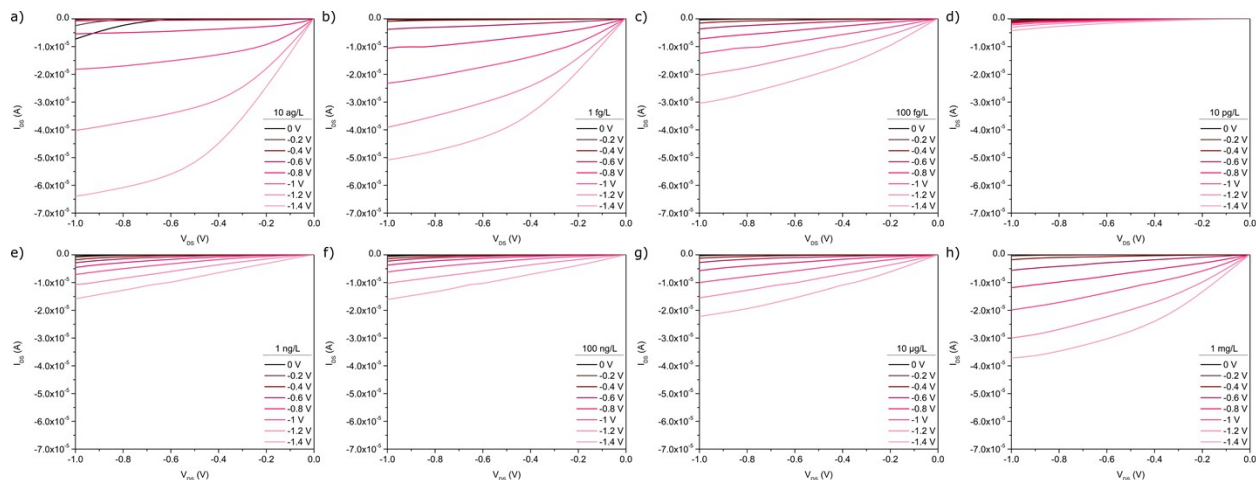

Figure S6. Output characteristics of the EG-SWNT-FET sensor using an electrolyte consisting of a) 10 ag/L, b) 1 fg/L, c) 100 fg/L, d) 10 pg/L, e) 1 ng/L, f) 100 ng/L, g) 10 µg/L, and h) 1 mg/L  $\alpha$ -synuclein in DI water.

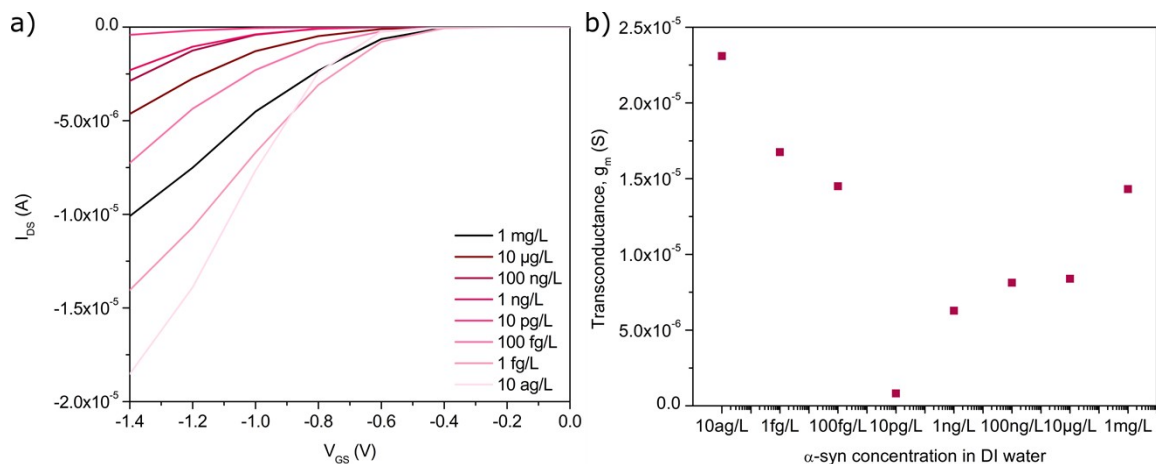

Figure S7. a) Transfer characteristics of the EG-SWNT-FET sensor using an electrolyte consisting of 10 ag/L, 1 fg/L, 100 fg/L, 10 pg/L, 1 ng/L, 100 ng/L, 10 µg/L, and 1 mg/L  $\alpha$ -synuclein in DI water. b) Transconductance ( $g_m$ ) calculated from the linear regime at all  $\alpha$ -synuclein dilutions in DI water.
